# Supplementary material
Source: publisher site journal article supplement (https://www.dovepress.com/article/437329)

**Supplemental Figure 1** Schematic of the method used to determine the optimal cut-off points of (a)NLR, (b)PLR, (c)LCR, (d)LMR, (e)CAR, (f)NAR, (g)MAR, (h)PAR, (i)N×M, (j)N×P, (k)N×C, (l)M×P, (m)M×C, (n)P×C, (o)L×A, (p)ALR, (q)AAR using R version for survival prediction.

**a**

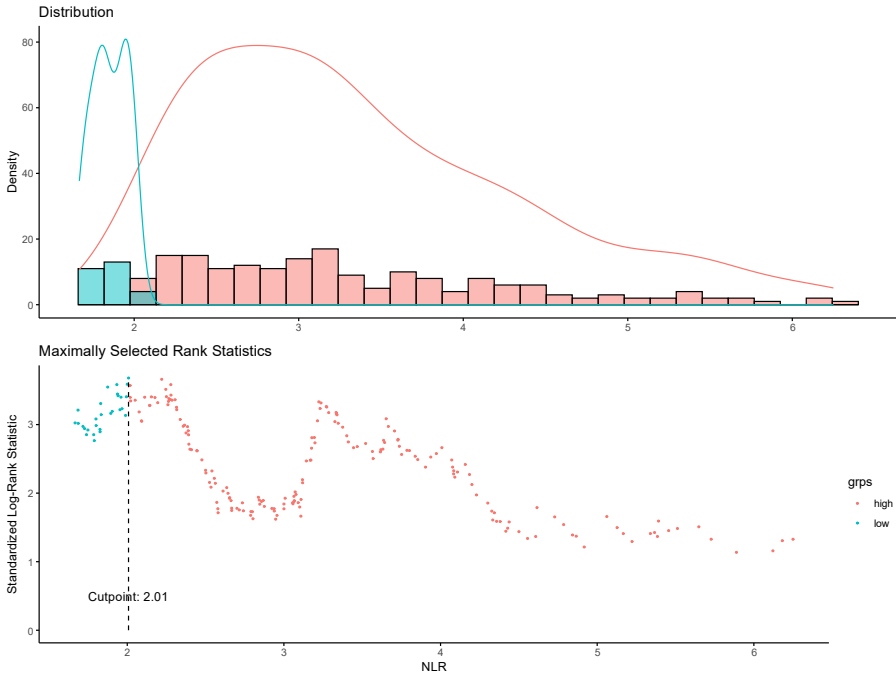

**b**

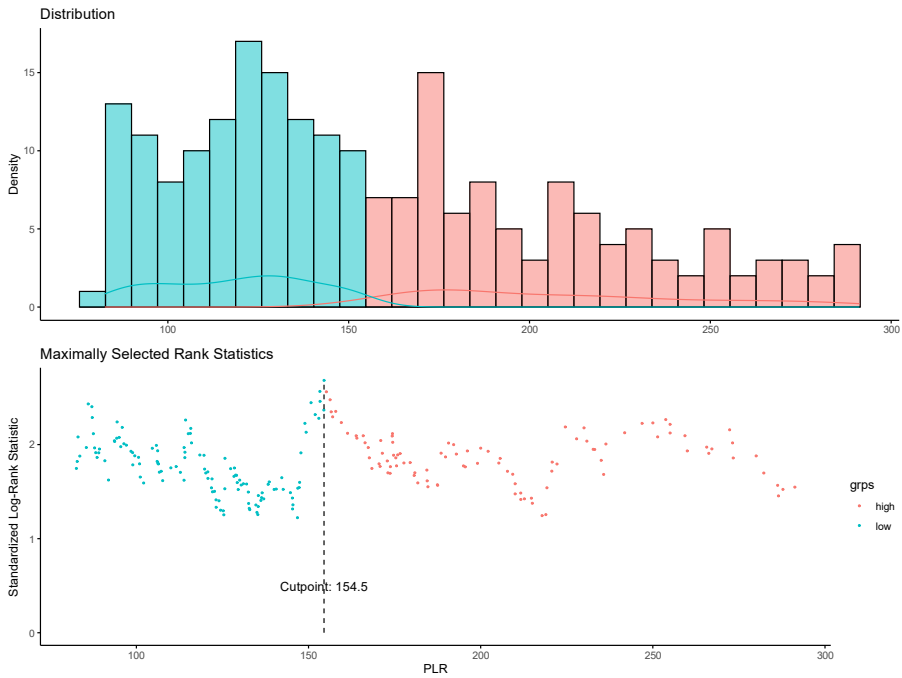

C

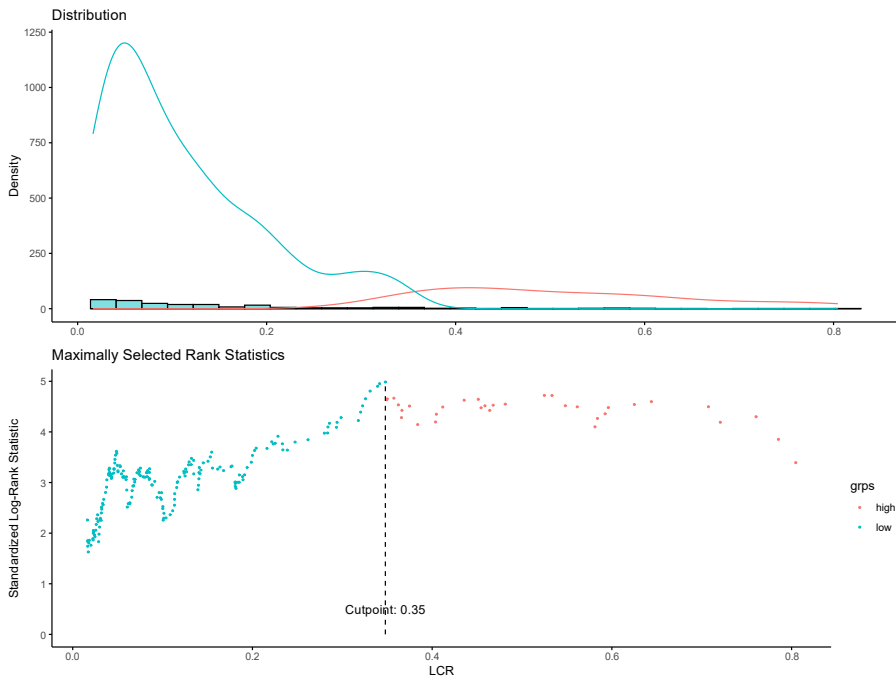

d

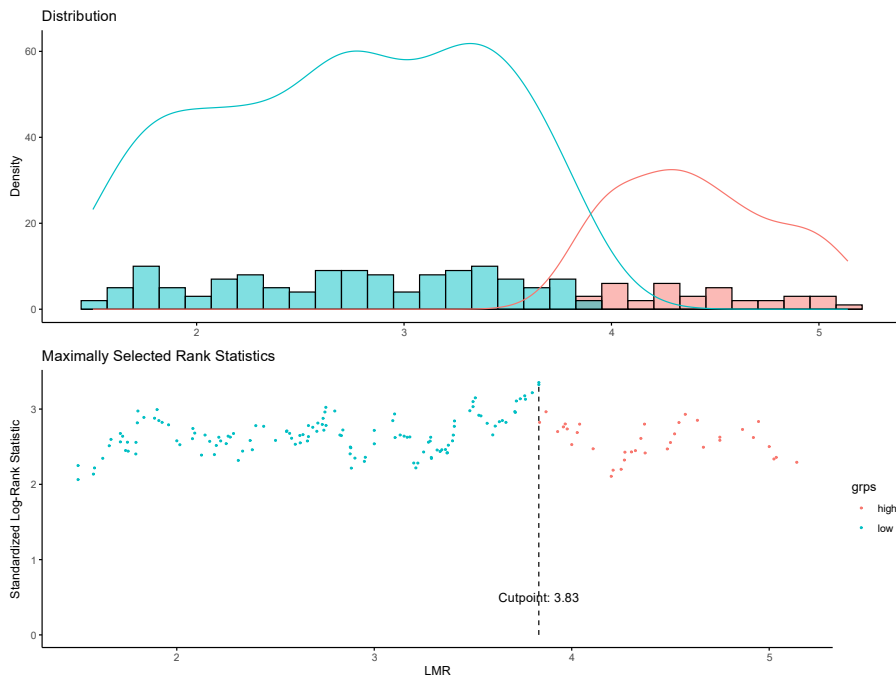

e

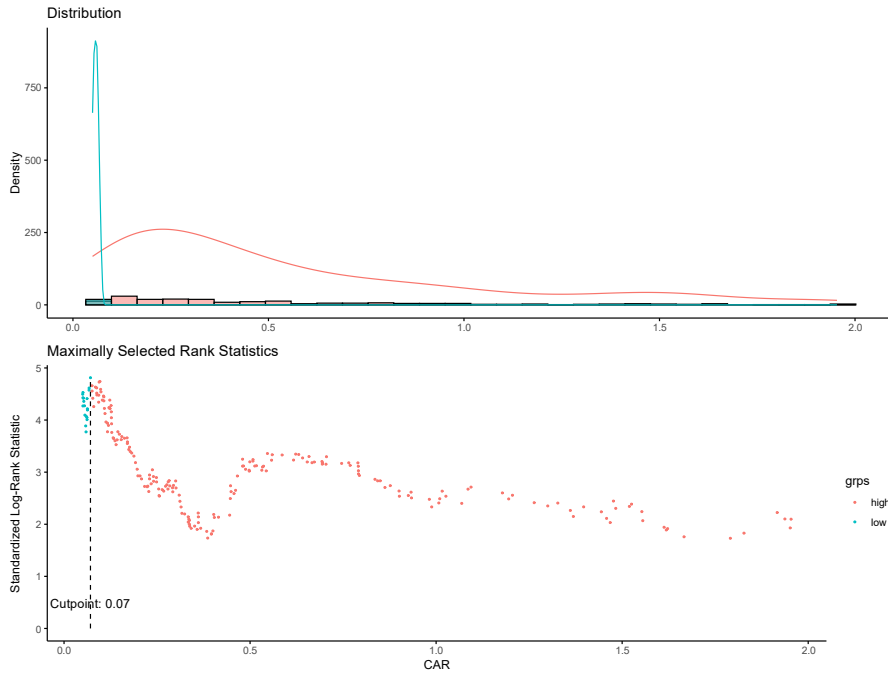

f

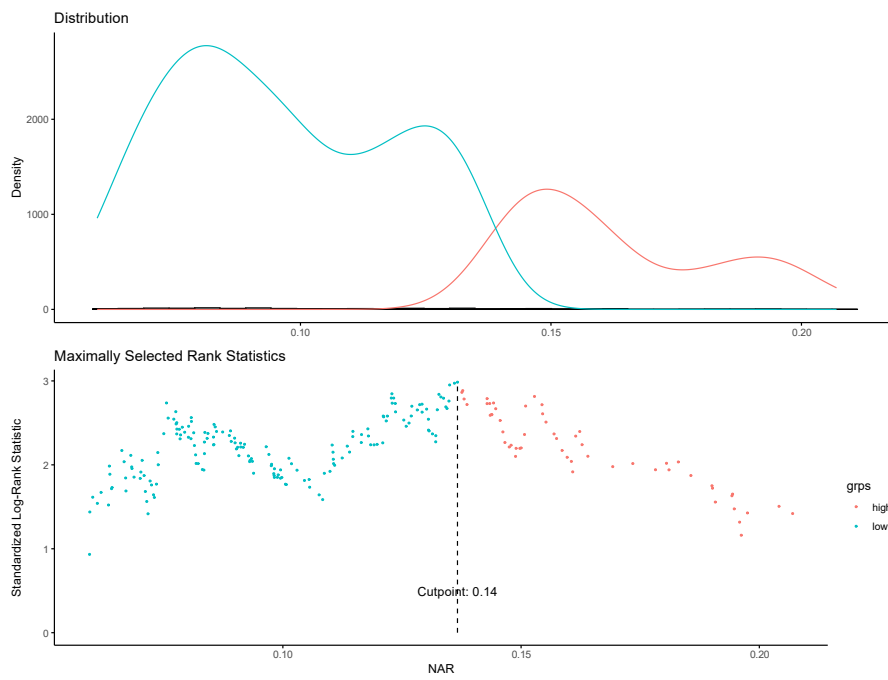

g

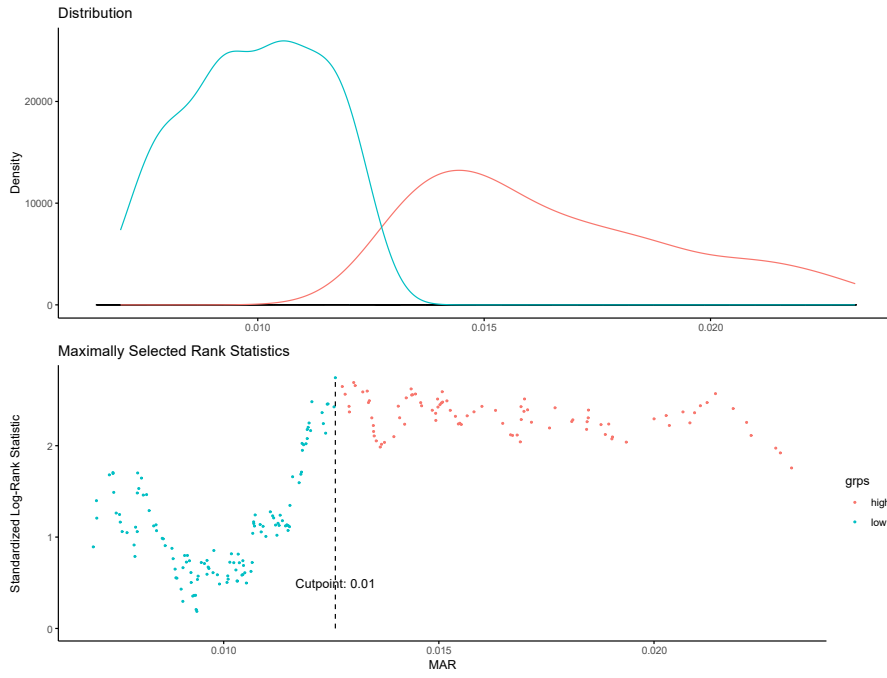

h

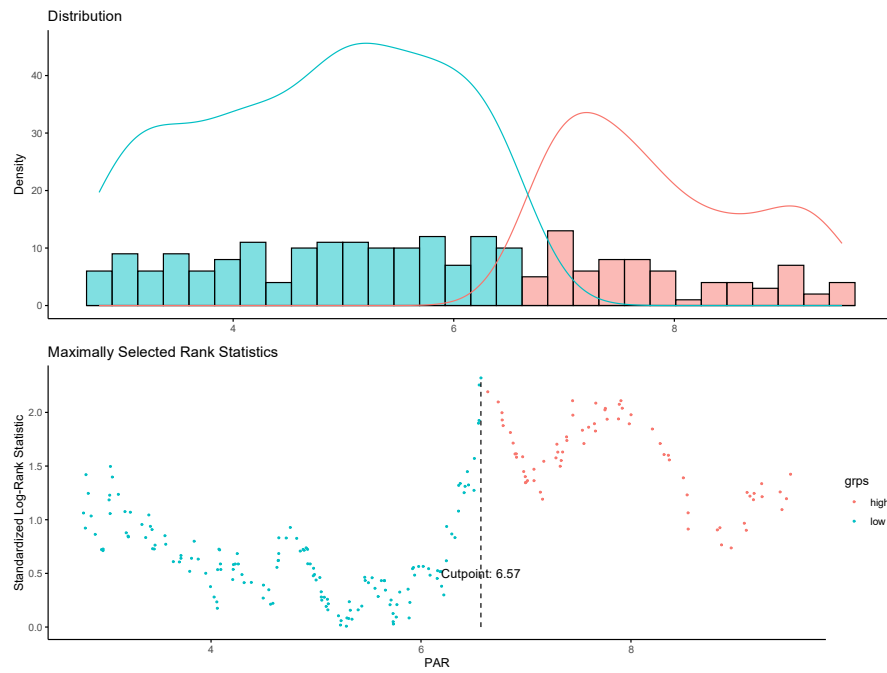

i

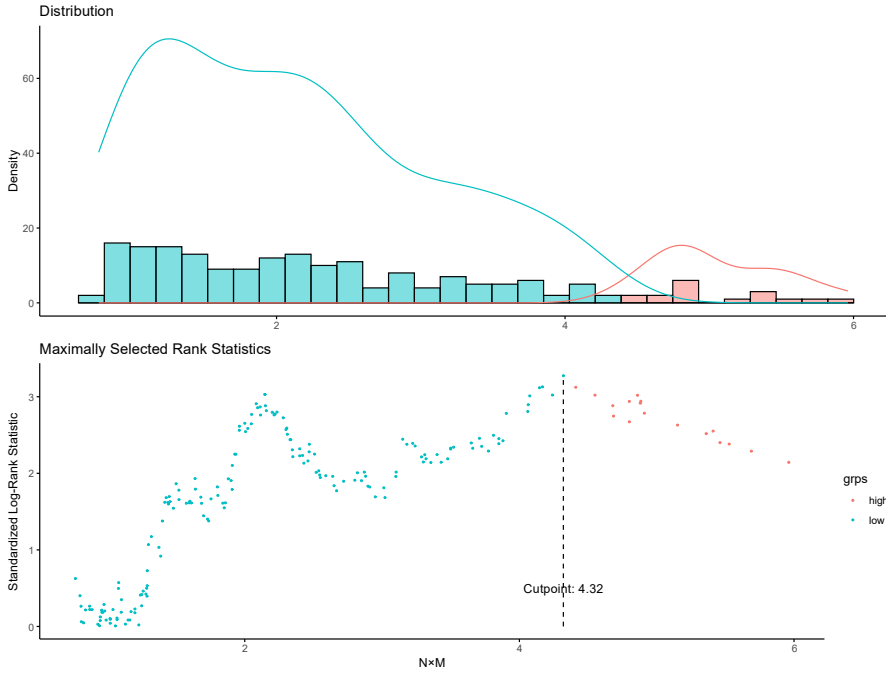

j

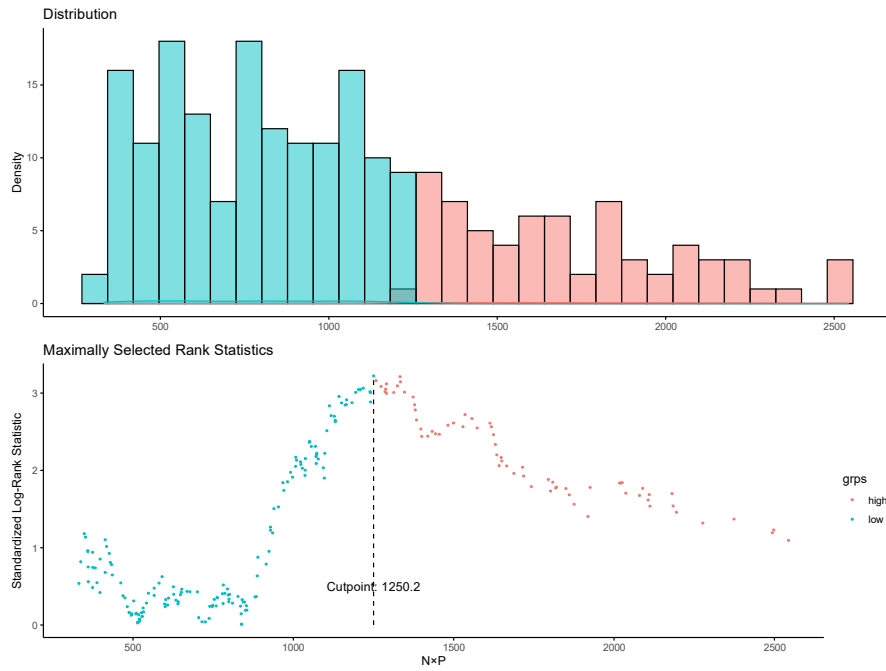

k

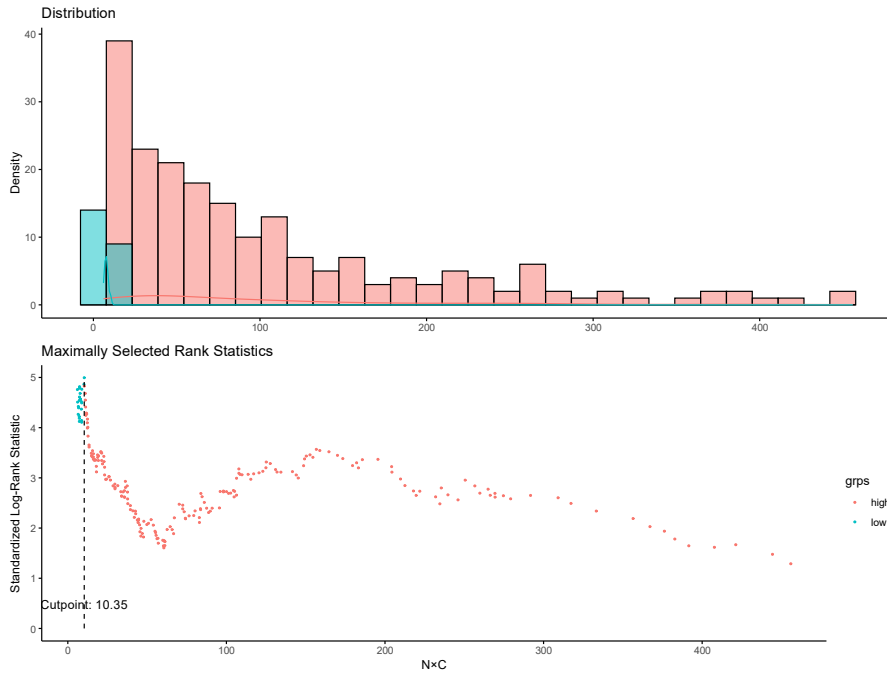

l

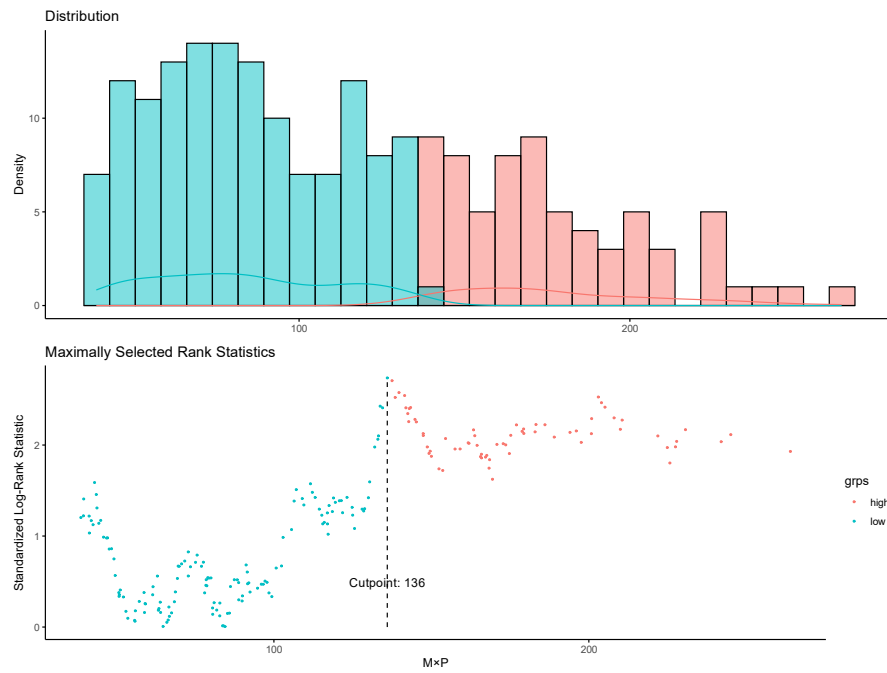

m

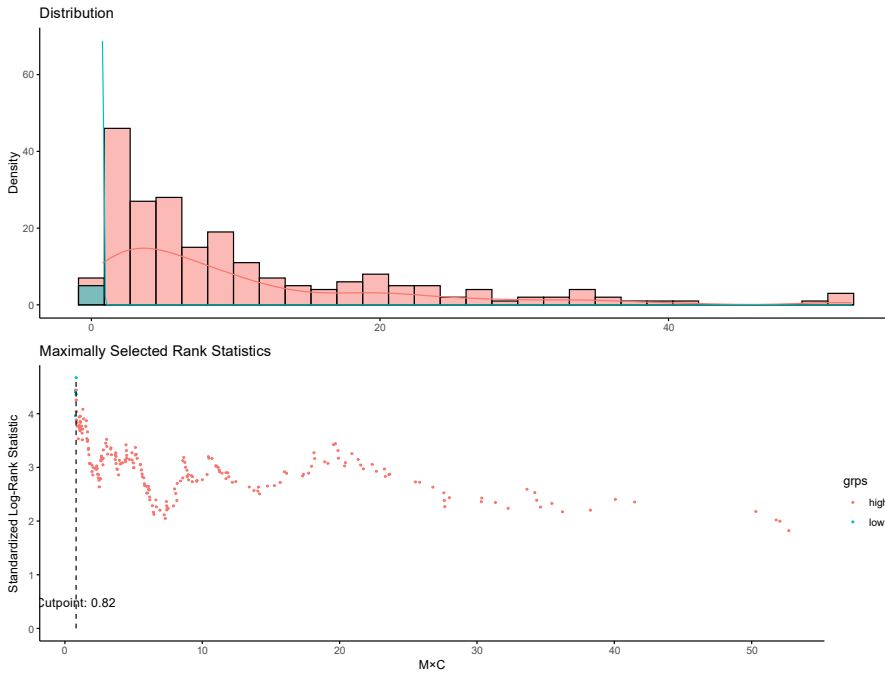

n

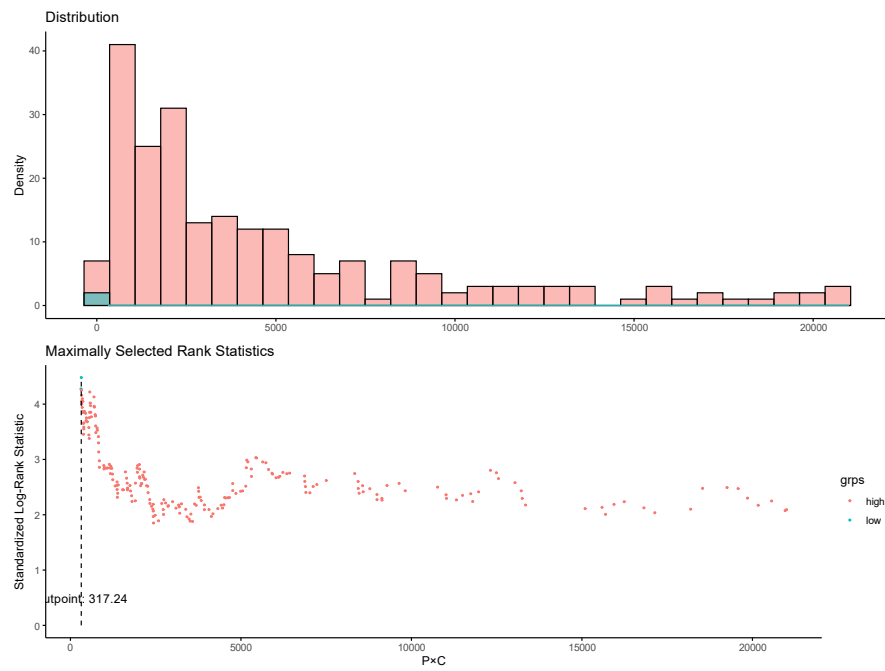

O

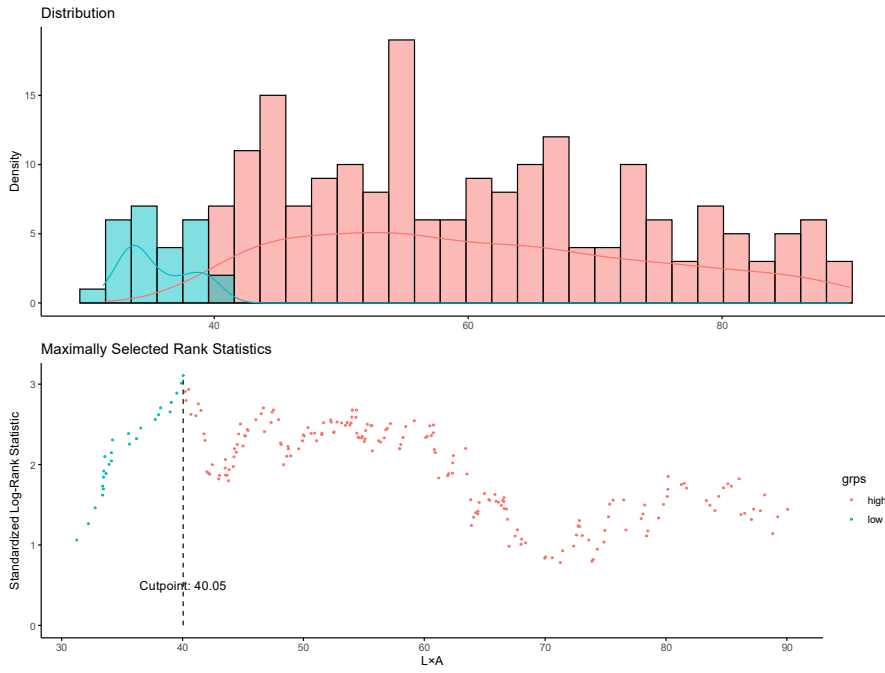

p

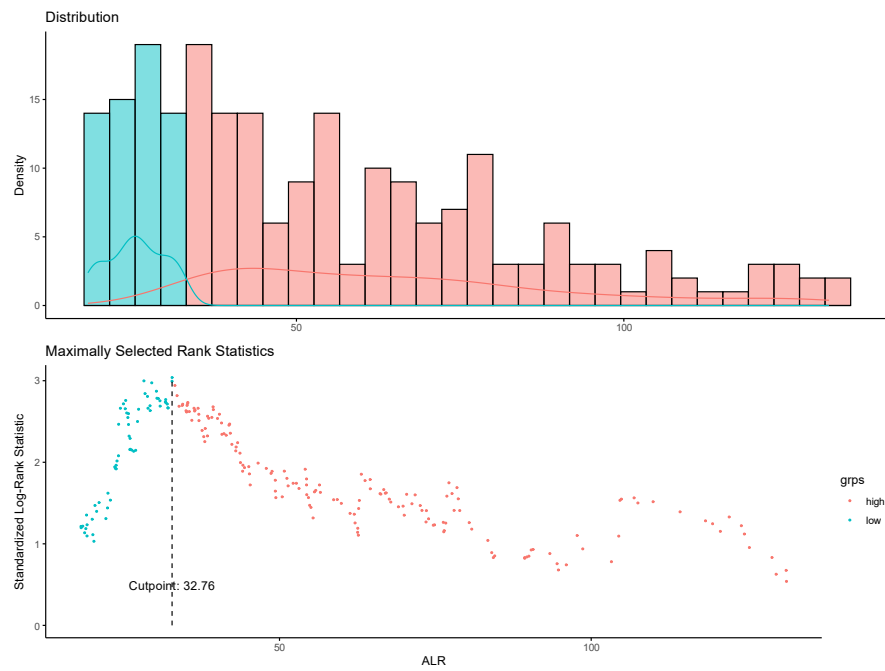



q

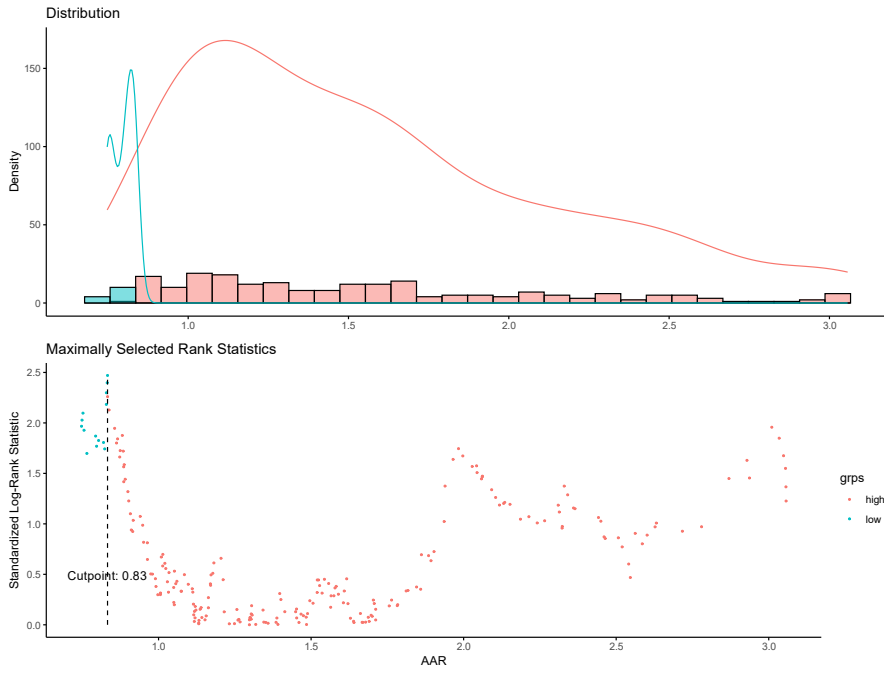

**Supplemental Figure 2** SIS is associated with OS in HCC patients with different response to HAIC. Kaplan–Meier estimates of overall survival in the non-PD group (a) and the PD group (b) of patients in the low- and high- SIS groups.

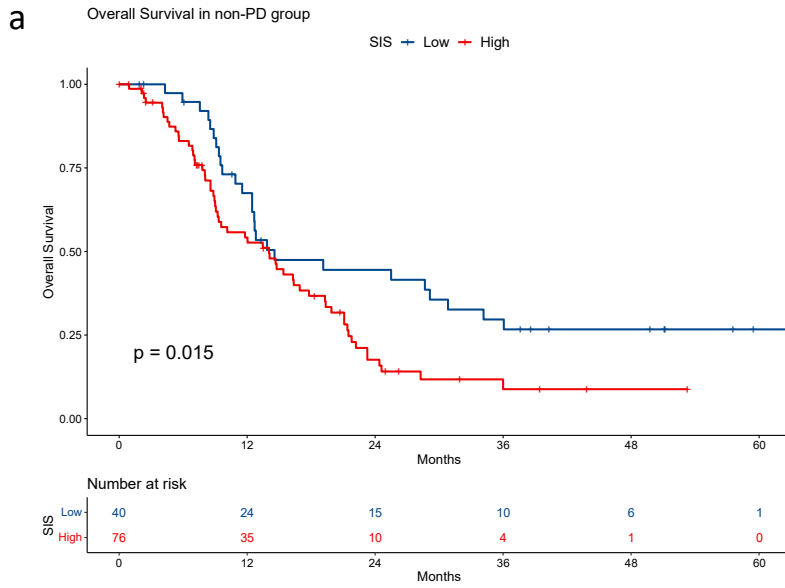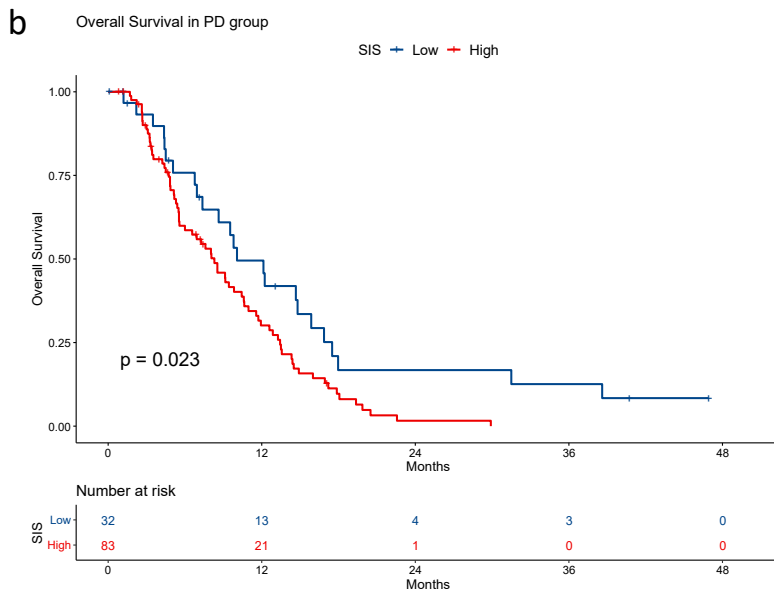

Supplement: Supplementary file 1 [file get_supplementary_file.php]
